# Supplementary material for: Response to Multiple Stressors: Enhanced Tolerance of Neoseiulus barkeri Hughes (Acari: Phytoseiidae) to Heat and Desiccation Stress through Acclimation
Source: MDPI journal article supplement (doi:10.3390/insects10120449), 2019-12-13
Supplement: s1 [file s1]

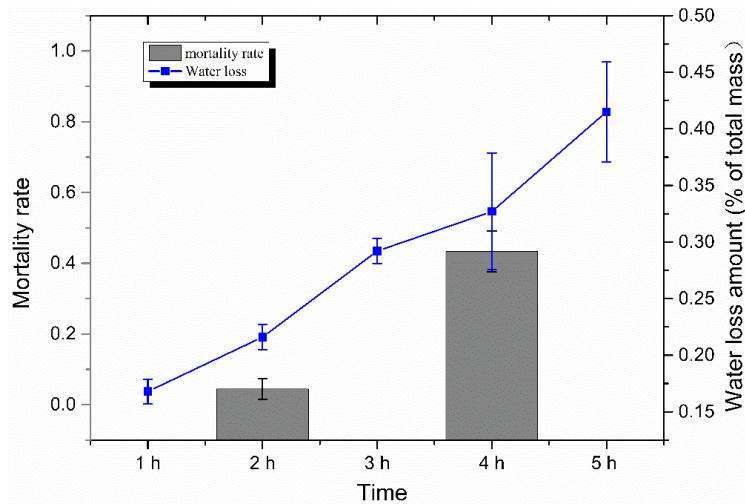

1 **Fig. S1.** Mortality and water loss amount of *Neoseiulus barkeri* female under 38 °C, 50% RH. The  
 2 methods used to test mortality rate and water loss amount was the same described in main text of  
 3 “Materials and Methods” without acclimation.

4 **Figure 2.** Mortality of *N. barkeri* females under 41 °C, 50% RH both grouped and individually. Group:  
 5 10 mites/cell, 3 cells/treatment; Individual: 1 mite/cell, 10 cells/ treatment. All treatments repeat 3  
 6 times.

7

8 **Table 1.** Set values (mean ± se) and observed values (mean ± se) of temperature and humidity in this  
 9 study.

| Temperature ( °C ) |                 | Relative humidity ( % ) |                 | Solution                          |
|--------------------|-----------------|-------------------------|-----------------|-----------------------------------|
| Set values         | Observed values | Set values              | Observed values |                                   |
|                    |                 | 100                     | 99.8 ± 0.1      | Distilled water                   |
| 25                 | 25.0 ± 0.1      | 50                      | 54.7 ± 0.1      | Mg(NO <sub>3</sub> ) <sub>2</sub> |
|                    |                 | 0                       | 4.6 ± 0.0       | CaCl <sub>2</sub>                 |
| 38                 | 38.1 ± 0.1      | 50                      | 49.4 ± 0.1      | Mg(NO <sub>3</sub> ) <sub>2</sub> |
| 41                 | 41.1 ± 0.1      | 50                      | 48.8 ± 0.0      | Mg(NO <sub>3</sub> ) <sub>2</sub> |

10 Temperature and humidity of the chambers were checked 48 h after boxes had been put to set temperatures for  
 11 equilibrium

12

13 **Table 2.** Water loss amount (Mean ± se) and water loss rate (Mean ± se) of *Neoseiulus barkeri* in different  
 14 acclimation treatment.

| Treatment | WLA<br>(% of total weight) | WLR<br>(% of total weight per hour) |
|-----------|----------------------------|-------------------------------------|
|           |                            |                                     |

| Control<br>(25 °C 100% RH) | 0            | 0            |
|----------------------------|--------------|--------------|
| 25 °C 50% RH 12 h          | 16.78 ± 0.90 | 1.40 ± 0.07  |
| 25 °C 50% RH 16 h          | 21.0 ± 1.08  | 1.31 ± 0.07  |
| 25 °C 0% RH 4 h            | 16.03 ± 1.61 | 4.01 ± 0.40  |
| 25 °C 0% RH 6 h            | 21.79 ± 2.68 | 3.63 ± 0.45  |
| 38 °C 50% RH 1 h           | 16.82 ± 1.86 | 11.21 ± 1.24 |
| 38 °C 50% RH 2 h           | 21.61 ± 1.57 | 10.80 ± 0.78 |
| 41 °C 50% RH 0.5 h         | 12.91 ± 0.42 | 25.82 ± 0.83 |
| 41 °C 50% RH 1 h           | 21.30 ± 0.58 | 21.30 ± 0.58 |
